# Supplementary material for: The composition of human vaginal microbiota transferred at birth affects offspring health in a mouse model
Source: PubMed Central journal article supplement (PMC8560944; doi:10.1038/s41467-021-26634-9), 2021-11-01
Supplement: 41467_2021_26634_MOESM1_ESM.pdf [file 41467_2021_26634_MOESM1_ESM.pdf]

# Supplementary Information for

## **The composition of human vaginal microbiota transferred at birth affects offspring health in a mouse model**

Eldin Jašarević<sup>1,2†</sup>, Elizabeth M. Hill<sup>1,2</sup>, Patrick J. Kane<sup>1,2</sup>, Lindsay Rutt<sup>3,4</sup>,  
Trevonn Gyles<sup>1,2</sup>, Lillian Folts<sup>1,2</sup>, Kylie D. Rock<sup>1,2</sup>, Christopher D. Howard<sup>1,2</sup>,  
Kathleen E. Morrison<sup>1,2</sup>, Jacques Ravel<sup>3,4</sup> and Tracy L. Bale<sup>1,2,5\*</sup>

\*Correspondence to: [tbale@som.umaryland.edu](mailto:tbale@som.umaryland.edu)

### **This file includes:**

Supplementary Table: 1  
Supplementary Figures and Legends: 1-15

### **Other supporting files:**

Source Data File

**Supplementary Table 1. Reagents and Resources used in this report**

| REAGENT or RESOURCE                      | SOURCE     | IDENTIFIER      |
|------------------------------------------|------------|-----------------|
| <b>Antibodies</b>                        |            |                 |
| CD45 (30-F11) – 89Y                      | Fluidigm   | Cat. # 3089005B |
| Ly6G (1A8) – 141Pr                       | Fluidigm   | Cat. # 3141008B |
| CD11c (N418) – 142Nd                     | Fluidigm   | Cat. # 3142003B |
| TCRb (H57-597) – 143Nd                   | Fluidigm   | Cat. # 3143010B |
| CD115 (AFS98) – 144Nd                    | Fluidigm   | Cat. # 3144012B |
| CD4 (RM4-5) – 145Nd                      | Fluidigm   | Cat. # 3145002B |
| CD11b (M1/70) – 148Nd                    | Fluidigm   | Cat. # 3148003B |
| CD19 (6D5) – 149Sm                       | Fluidigm   | Cat. # 3149002B |
| IgD (11-26c.2a) – 150Nd                  | Fluidigm   | Cat. # 3150011B |
| IgM (RMM-1) – 151Eu                      | Fluidigm   | Cat. # 3151006B |
| CD3 (145-2C11) – 152Sm                   | Fluidigm   | Cat. # 3152004B |
| CD274/PD-L1 (10F.9G2) – 153Eu            | Fluidigm   | Cat. # 3153016B |
| CD27 (LG.3A10) – 154Sm                   | Fluidigm   | Cat. # 3150017B |
| CD64 (X54-5/7.1) – 155Gd                 | Fluidigm   | Cat. # 3151012B |
| CD14 (Sa14-2) – 156Gd                    | Fluidigm   | Cat. # 3156009B |
| FoxP3 (FJK-16s) – 158Gd                  | Fluidigm   | Cat. # 3158003A |
| F4/80 (BM8) – 159Tb                      | Fluidigm   | Cat. # 3159009B |
| CD62L L-selectin (MEL-14) – 160Gd        | Fluidigm   | Cat. # 3160008B |
| CD90 (T24/31) – 161Dy                    | Fluidigm   | Cat. # 3161009B |
| Ly6C (Hk1.4) – 162Dy                     | Fluidigm   | Cat. # 3162014B |
| APC (APC003) – 163Dy                     | Fluidigm   | Cat. # 3163001B |
| APC anti-mouse MerTK (2B10C42)           | BioLegend  | Cat. # 151508   |
| CX3CR1 (SA011F11) – 164Dy                | Fluidigm   | Cat. # 3164023B |
| Biotin – 165Ho                           | Fluidigm   | Cat. # 3165012B |
| Biotin anti-mouse CD192/CCR2 (SA203G11)  | BioLegend  | Cat. # 150628   |
| CD117 cKit (2B8) – 166Er                 | Fluidigm   | Cat. # 3166004B |
| CD8a (53-6.7) – 168Er                    | Fluidigm   | Cat. # 3168003B |
| Ly6A/E (D7) – 169Tm                      | Fluidigm   | Cat. # 3169015B |
| CD49b (HMa2) – 170Er                     | Fluidigm   | Cat. # 3170008B |
| CD44 (IM7) – 171Yb                       | Fluidigm   | Cat. # 3171003B |
| Maxpar Ready CD24 (M1/69)                | BioLegend  | Cat. # 101829   |
| Maxpar Ready NK-1.1 (PK136)              | BioLegend  | Cat. # 108743   |
| Maxpar Ready CD335/NKp46 (29A1.4)        | BioLegend  | Cat. # 137625   |
| CD45R/B220 (RA3-6B2) – 175Lu             | Fluidigm   | Cat. # 3176002B |
| FceR1a (MAR-1) – 176Yb                   | Fluidigm   | Cat. # 3176006B |
| I-A/I-E (M5/114.15.2) – 209Bi            | Fluidigm   | Cat. #3209006B  |
|                                          |            |                 |
| <b>Bacterial and Virus Strains</b>       |            |                 |
| <i>Gardnerella vaginalis</i> strain 11E4 | This paper | N/A             |
|                                          |            |                 |
| <b>Biological Samples</b>                |            |                 |
|                                          |            |                 |

|                                                      |                        |                       |
|------------------------------------------------------|------------------------|-----------------------|
| Human donor CST I (EM15_W1D7)                        | This paper             | N/A                   |
| Human donor CST IV (UAB116_W1D7)                     | This paper             | N/A                   |
| Human donor CST I (EM15_W1D7(2))                     | This paper             | N/A                   |
| Human donor CST IV (UAB116_W1D7(2))                  | This paper             | N/A                   |
| Human donor CST I Week 36 (BMR0017)                  | This paper             | N/A                   |
| Human donor CST I Week 37 (BMR0017)                  | This paper             | N/A                   |
| Human donor CST IV Week 36 (BMR0038)                 | This paper             | N/A                   |
| Human donor CST IV Week 37 (BMR0038)                 | This paper             | N/A                   |
| Human donor CST I Week 39 (BMR0089)                  | This paper             | N/A                   |
| Human donor CST IV Week 38 (BMR0038)                 | This paper             | N/A                   |
|                                                      |                        |                       |
| <b>Chemicals, Peptides, and Recombinant Proteins</b> |                        |                       |
| Vancomycin                                           | Sigma-Aldrich          | Cat. # V2002          |
| Ampicillin                                           | Sigma-Aldrich          | Cat. # A9393          |
| Neomycin                                             | Sigma-Aldrich          | Cat. # N6386          |
| Sodium Azide                                         | Sigma-Aldrich          | Cat. # S2002          |
| Bovine Serum Albumin                                 | Sigma-Aldrich          | Cat. # 05470          |
| Fetal Bovine Serum                                   | Sigma-Aldrich          | Cat. # F2442          |
| 1X PBS                                               | Lonza                  | Cat. # 04-409R        |
| Maxpar Cell Staining Buffer                          | Fluidigm               | Cat. # 201068         |
| Maxpar Water                                         | Fluidigm               | Cat. # 201069         |
| Maxpar Fix I Buffer                                  | Fluidigm               | Cat. # 201065         |
| Maxpar Fix and Perm Buffer                           | Fluidigm               | Cat. # 201067         |
| Cell-ID Intercalator-Ir—500 $\mu$ M                  | Fluidigm               | Cat. # 201192B        |
| Cell-ID Cisplatin                                    | Fluidigm               | Cat. # 201064         |
| Maxpar X8 Multimetal Labeling Kit                    | Fluidigm               | Cat. # 201300         |
| Cell-ID 20-Plex Pd Barcoding Kit                     | Fluidigm               | Cat. # 201060         |
| EQ Four Element Calibration Beads                    | Fluidigm               | Cat. # 201078         |
| Sso Advanced Universal Probes Supermix               | BioRad                 | Cat. # 1725280        |
|                                                      |                        |                       |
|                                                      |                        |                       |
| <b>Critical Commercial Assays</b>                    |                        |                       |
| <b>RNeasy Mini Kit</b>                               |                        |                       |
| RNeasy Mini Kit                                      | Qiagen                 | Cat. # 74104          |
| TruSeq Stranded mRNA Kit                             | Illumina               | Cat. # 20020595       |
| Agilent High Sensitivity D1000 ScreenTape Assay      | Agilent                | Cat. # 5067-5584      |
| Agilent High Sensitivity D5000 ScreenTape Assay      | Agilent                | Cat. # 5067-5592      |
| Agilent High Sensitivity RNA ScreenTape Assay        | Agilent                | Cat. # 5067-5579      |
| Qubit RNA HS Assay Kit                               | ThermoFisher           | Cat. # Q32852         |
| Qubit dsDNA HS Assay Kit                             | ThermoFisher           | Cat. # Q32851         |
| Stratec PSP Spin Stool DNA Plus kit                  | STRATEC Molecular GmbH | Cat. # 1038100100-STM |
| Agencourt Ampure XP Beads                            | Beckman Coulter        | Cat. # A63881         |
| Whole Blood Cell Stabilizer Kit                      | Cytodelics AB          | Cat. # mC001-1000mL   |

|                                                    |                        |                                                                                                                                                     |
|----------------------------------------------------|------------------------|-----------------------------------------------------------------------------------------------------------------------------------------------------|
| TaqMan Vaginal Microbiota Amplification Control    | ThermoFisher           | Cat. # A32912                                                                                                                                       |
| TaqMan MGB Probe                                   | ThermoFisher           | Cat. # 4316034                                                                                                                                      |
| <b>Experimental Models: Organisms/Strains</b>      |                        |                                                                                                                                                     |
| Mice: C56Bl/6J                                     | The Jackson Laboratory | Stock No: 000664                                                                                                                                    |
| Mice: 129S1/SvImJ                                  | The Jackson Laboratory | Stock No: 002448                                                                                                                                    |
| <b>Oligonucleotides</b>                            |                        |                                                                                                                                                     |
| Forward primer Jarid1<br>5'-TGAAGCTTTTGGCTTTGAG-3' | This paper             | N/A                                                                                                                                                 |
| Reverse primer Jarid1<br>5'-CCGCTGCCAAATTCTTTGG-3' | This paper             | N/A                                                                                                                                                 |
| <b>Software and Algorithms</b>                     |                        |                                                                                                                                                     |
| R version 4.0.2                                    | R Core Team, 2020      | <a href="https://www.r-project.org/">https://www.r-project.org/</a>                                                                                 |
| RStudio version 1.2.5001                           | RStudio, Inc.          | <a href="https://www.rstudio.com/">https://www.rstudio.com/</a>                                                                                     |
| speciateIT                                         | NA                     | <a href="https://github.com/Ravel-Laboratory/speciateIT">https://github.com/Ravel-Laboratory/speciateIT</a>                                         |
| Bioconductor                                       | NA                     | <a href="https://www.bioconductor.org/">https://www.bioconductor.org/</a>                                                                           |
| kallisto                                           | NA                     | <a href="https://pachterlab.github.io/kallisto/">https://pachterlab.github.io/kallisto/</a>                                                         |
| tximport                                           | NA                     | <a href="https://bioconductor.org/packages/release/bioc/html/tximport.html">https://bioconductor.org/packages/release/bioc/html/tximport.html</a>   |
| edgeR                                              | NA                     | <a href="https://bioconductor.org/packages/release/bioc/html/edgeR.html">https://bioconductor.org/packages/release/bioc/html/edgeR.html</a>         |
| limma                                              | NA                     | <a href="https://www.bioconductor.org/packages/release/bioc/html/limma.html">https://www.bioconductor.org/packages/release/bioc/html/limma.html</a> |
| The Astrolabe Cytometry Platform                   | NA                     | <a href="https://www.astrolabediagnosics.com/">https://www.astrolabediagnosics.com/</a>                                                             |
| Cytobank                                           | NA                     | <a href="https://www.cytobank.org/">https://www.cytobank.org/</a>                                                                                   |
| viSNE                                              | NA                     | <a href="https://www.cytobank.org/">https://www.cytobank.org/</a>                                                                                   |
| FlowSOM                                            | NA                     | <a href="https://www.cytobank.org/">https://www.cytobank.org/</a>                                                                                   |
| <b>Diet and Glucose Monitor</b>                    |                        |                                                                                                                                                     |
| Contour Next Blood Glucose Monitoring System       | Bayer                  | Cat. # 0193-9763-01                                                                                                                                 |
| Low-Fat High-Fiber Diet                            | LabDiet                | Cat. # 5001                                                                                                                                         |
| High-Fat Low-Fiber Diet                            | Research Diets         | Cat. # D12492                                                                                                                                       |
|                                                    |                        |                                                                                                                                                     |

# Supplementary Figure 1

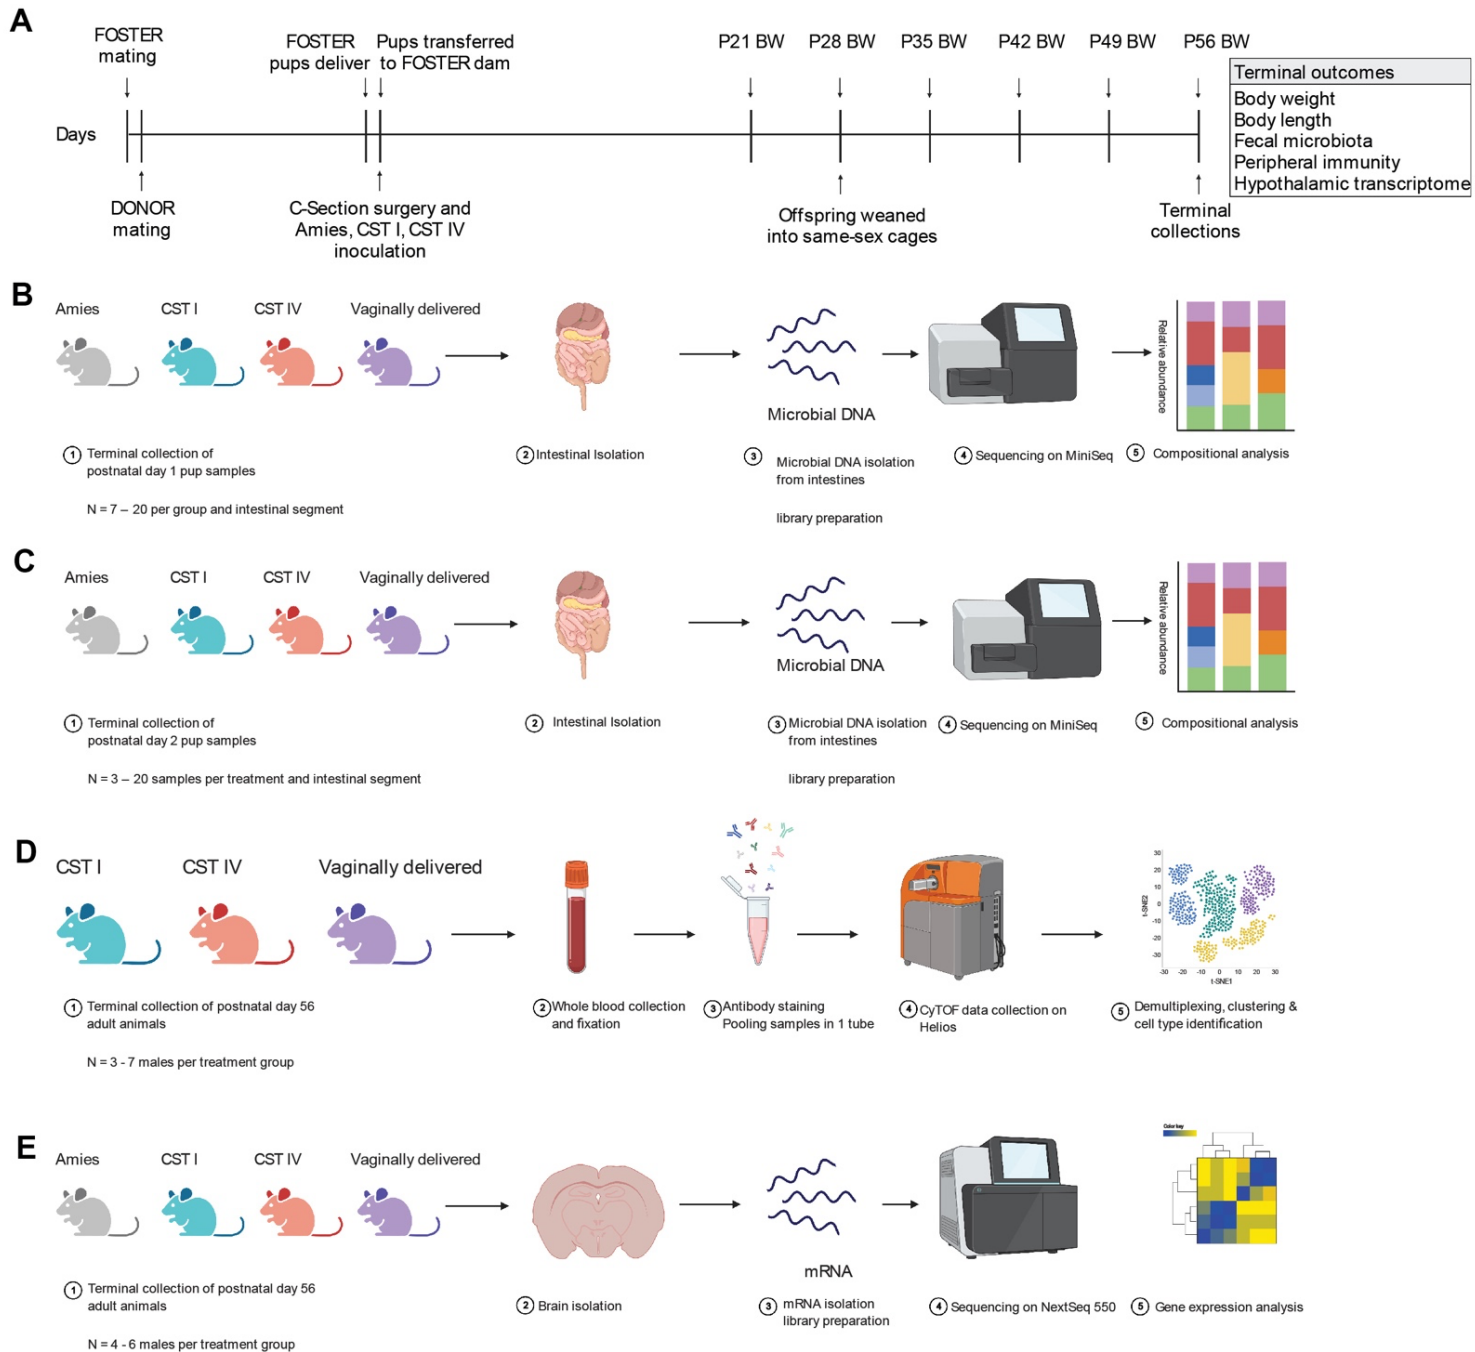

**Supplementary Figure 1. Experimental schematics to assess the impact of distinct maternal microbial communities on offspring outcomes.**

(A) Timeline for all C-section and oral gavage experiments to assess the impact of CST I and CST IV on offspring outcomes, with specific relevance to proof-of-concept experiments depicted in Figure 1 and Supplemental Figure 3-6. Offspring were inoculated with Amies, CST I, or CST IV and transferred to the same foster dam, along with vaginally delivered pups donated from a treatment-naïve donor dam. A subcohort of pups were culled at postnatal day 1 for 16S rRNA gene marker sequencing, and a separate subcohort of pups were culled at postnatal day 2 for microbiome sequencing 16S rRNA gene marker sequencing. Litters contained 8 pups, with 1 male and 1 female from each treatment group represented. Pups were left undisturbed until postnatal day 21, upon which weekly body weight measurements were collected. On postnatal day 28, pups were weaned into same-sex cages. On postnatal day 56, offspring were culled, and terminal body weight and body length was collected. Additionally, fecal pellets, whole blood, and brains were collected for downstream analysis. P, postnatal days. BW, Body Weight. Created with BioRender.com.

(B) Schematic of experiments depicted in Figure 1b and Supplemental Figures 2. Samples collected were on postnatal day 1 to measure microbial composition across offspring intestinal segments using 16S rRNA marker gene sequencing or additional verification by qPCR. Twenty-four hours following C-section, inoculation and transfer to foster dam, offspring were culled, and intestinal segments were collected for 16S rRNA gene marker sequencing.

(C) Schematic of experiments depicted in Figure 1b and Supplemental Figure 3. Samples were collected on postnatal day 2 to measure microbial composition across offspring intestinal segments using 16S rRNA marker gene sequencing. Forty-eight hours following C-section, inoculation and transfer to foster dam, offspring were culled, and intestinal segments were collected for 16S rRNA gene marker sequencing.

(D) Schematic of experiments depicted in Figure 1d-h and Supplemental Figure 6. Samples were collected on postnatal day 56 to measure circulating immunity using CyTOF. Terminal whole blood was collected, stabilized, followed by barcoding, multiplexing, and antibody staining, data collection on the Helios, and downstream analysis, as detailed in *Methods*.

(D) Schematic of experiments depicted in Figure 1i-j. Samples were collected on postnatal day 56 to measure gene expression patterns in the paraventricular nucleus of the hypothalamus. Offspring brains were rapidly excised and frozen on dry ice. PVN micropunches were collected, mRNA was isolated, cDNA libraries were prepared, sequenced, and downstream gene expression analysis was conducted.

## Supplementary Figure 2

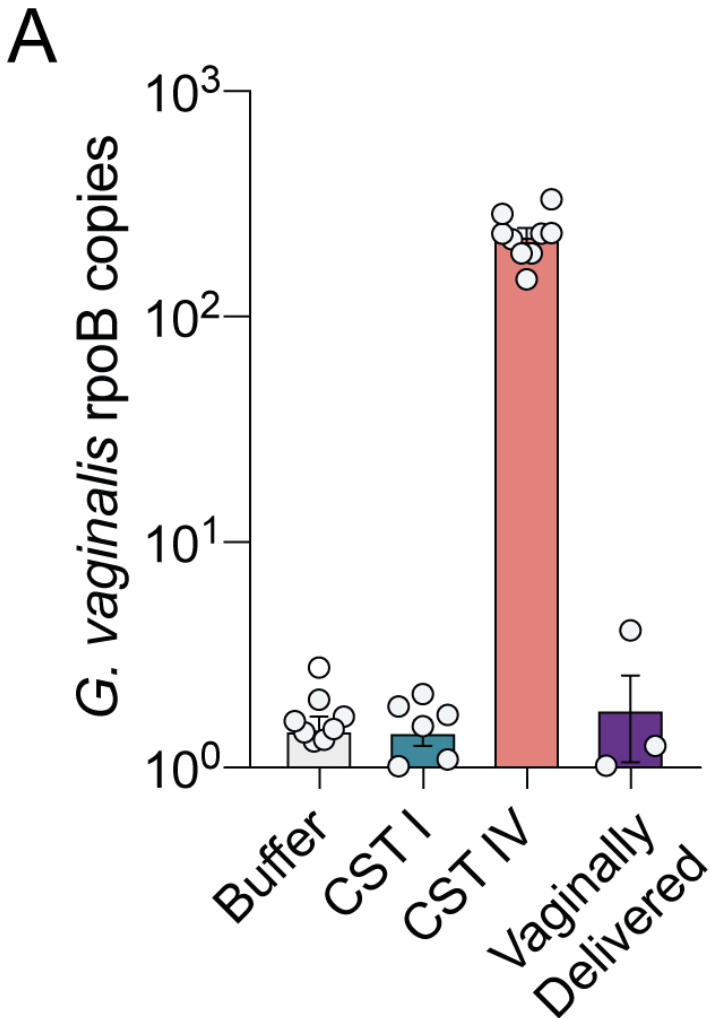

**Supplementary Figure 2. Quantitative PCR-based validation of human vaginal microbiota in the intestine of C-section delivered mice exposed to Amies, CST I or CST IV or vaginally delivered pups.**

(A) C-section mice inoculated with CST IV show increased rpoB copy number compared with Amies, CST I and vaginally delivered offspring. Copy number of *G. vaginalis* was quantified using TaqMan assay for *rpoB*, and the TaqMan vaginal microbiota amplification control was used to evaluate amplification efficiency. N = 8 Amies, 6 CST I, 9 CST IV, 3 vaginally delivered. Data represented as mean  $\pm$  SEM with individual data points overlaid.

# Supplementary Figure 3

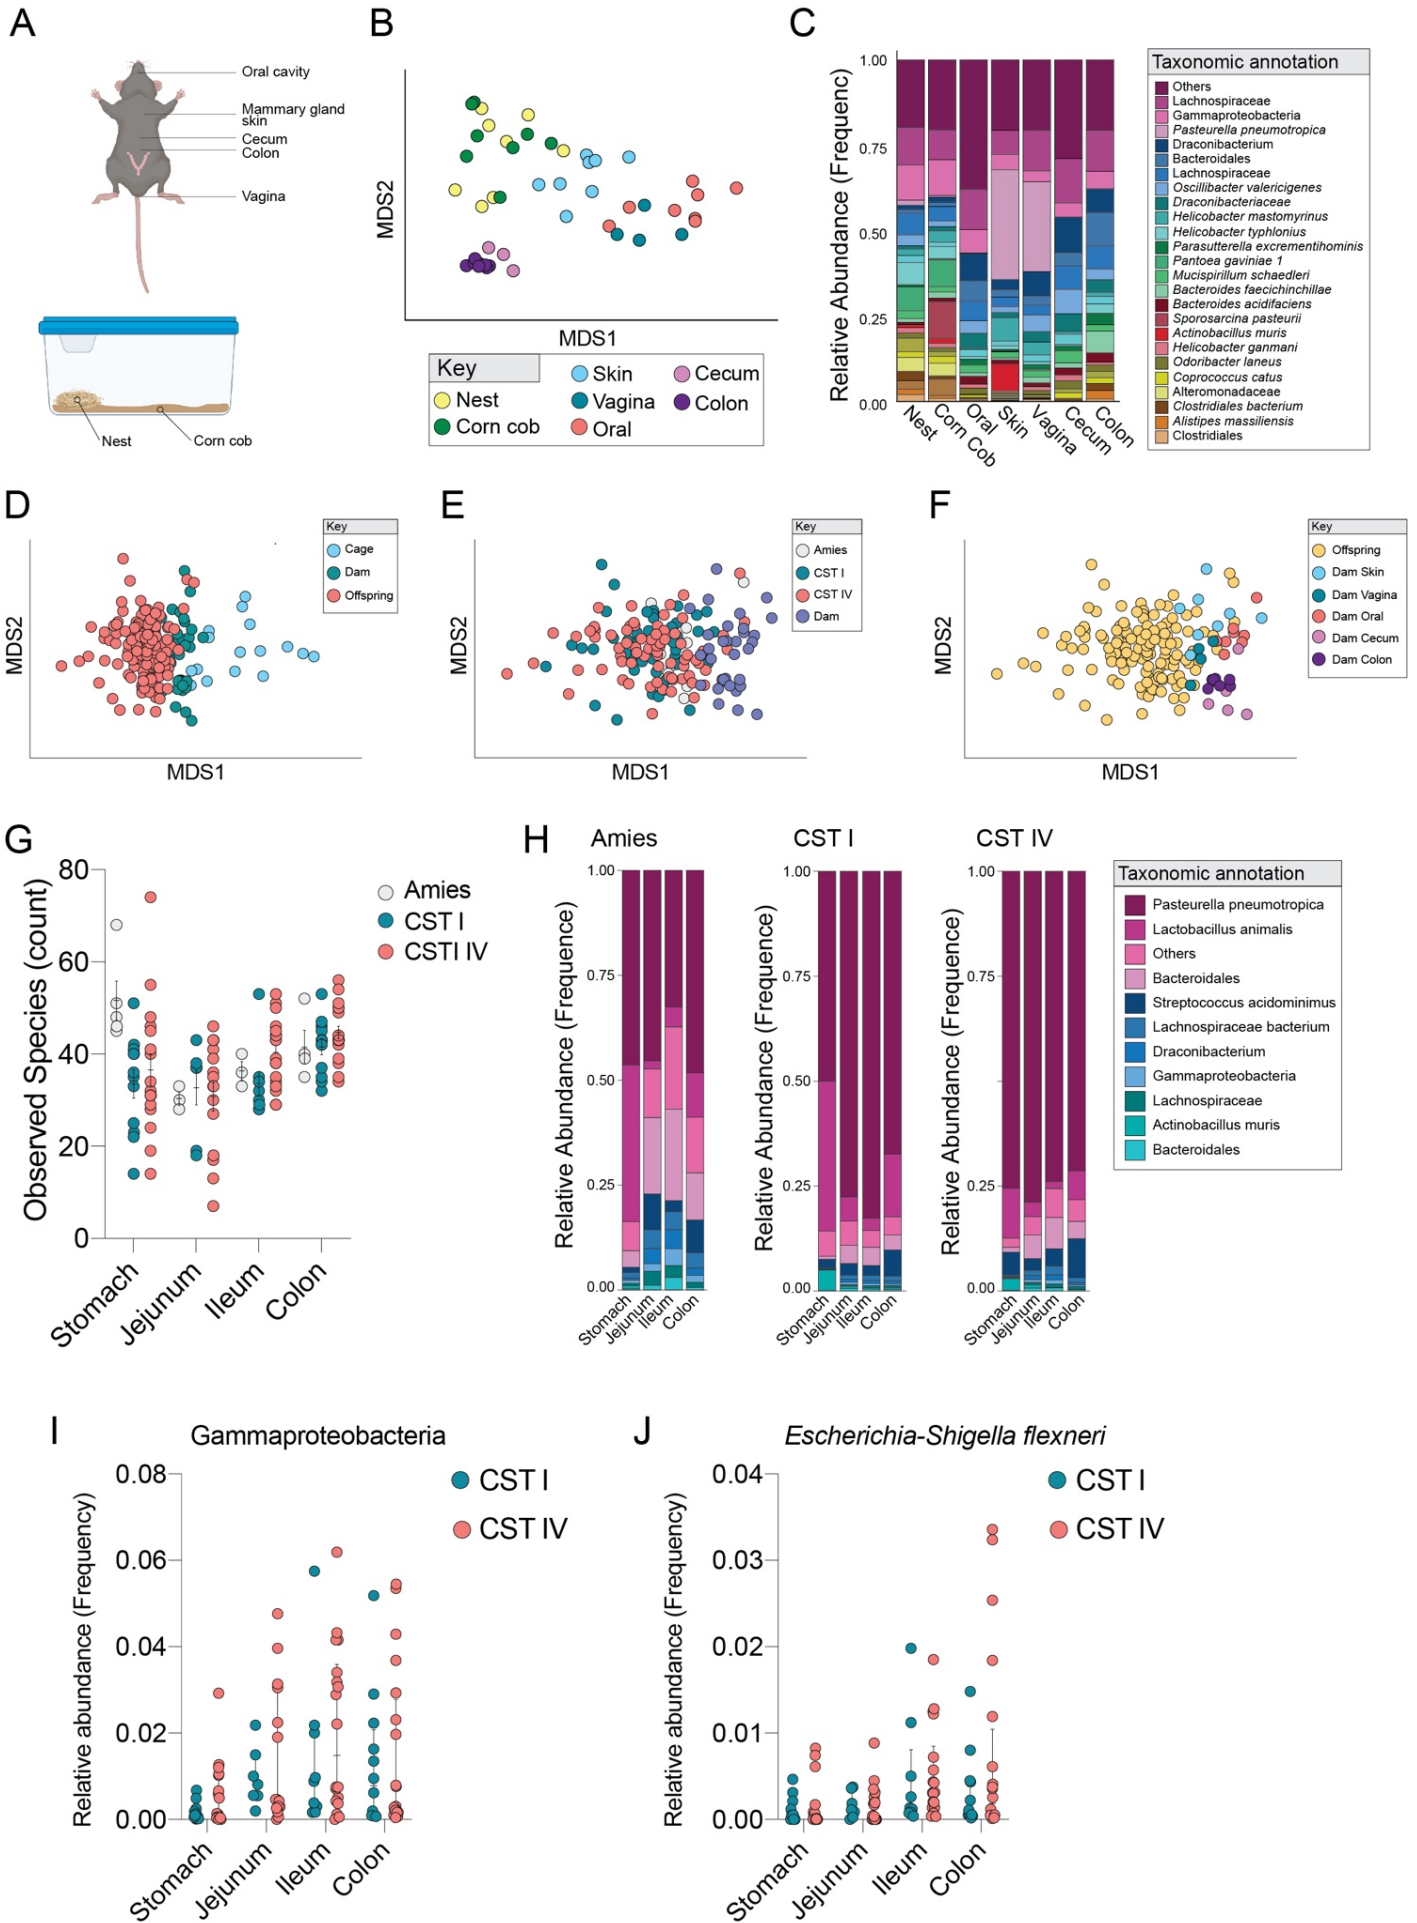



**Supplementary Figure 3. Characterizing the environmental and maternal microbial reservoirs that contribute to microbial assembly in C-section offspring.**

(A) Schematic of the samples collected to determine the microbial reservoirs involved in vertical transmission. The local cage environment was assessed by sampling nestlet material on which pups had direct physical contact, and corn cob was sampled surrounded the nestlet. Maternal samples were collected as depicted in the schematic. Created with BioRender.com.

(B) Non-metric multidimensional scaling (NMDS) analysis of environmental and maternal samples showing that clustering was influenced by maternal body site.

(C) Mean relative abundance of the top 20 taxa across maternal body sites and the local cage environment, demonstrating a bloom of *Pasteurella* recovered from the mammary gland associated skin and vagina of the foster dam.

(D) NMDS analysis of offspring, foster dam, and cage samples showing distinct clustering of offspring and cage samples, with foster dam as an intermediary. N = 3 – 15 samples per treatment and intestinal segment; 15 cage samples; 32 foster dam samples.

(E) NMDS analysis showing no distinct clustering between gut samples from Amies, CST I and CST IV inoculated C-section pups. N = 128 C-section pup samples; 32 foster dam samples.

(F) NMDS analysis showing closest clustering between C-section pup gut samples and the foster dams compared with samples from the vagina, cecum, colon, and oral cavity of the foster dam. N = 128 C-section pup samples; 32 foster dam samples.

(G) Barplot demonstrating intestinal region-specific differences in alpha diversity in Amies, CST I, and CST IV C-section pups. N = Stomach: 5 Amies, 11 CST I, 15 CST IV; Jejunum: 3 Amies, 5 CST I, 13 CST IV; Ileum: 3 Amies, 6 CST I, 14 CST IV; Colon: 4 Amies, 10 CST I, 13 CST IV samples that passed quality filtering. Data represented as mean  $\pm$  SEM with individual data points overlaid.

(H) Mean relative abundance of the top 20 taxa across intestinal segments between Amies, CST I, CST IV C-section pups demonstrating that *Pasteurella* as a dominant taxon in the neonate gut. N = 3 – 15 samples per treatment and intestinal segment.

(I) Linear discriminant analysis - Effect Size (LEfSe) analysis demonstrating increased abundance of Gammaproteobacteria in CST IV inoculated C-section offspring in an intestinal region-specific manner (FDR = 0.007, LDA score = 4.86). N = Stomach: 11 CST I, 15 CST IV; Jejunum: 5 CST I, 13 CST IV; Ileum: 6 CST I, 14 CST IV; Colon: 10 CST I, 13 CST IV samples that passed quality filtering. Data represented as median  $\pm$  IQR with individual data points overlaid.

(J) Linear discriminant analysis - Effect Size (LEfSe) analysis demonstrating increased abundance of *Escherichia-Shigella* in CST IV inoculated C-section offspring in an intestinal region-specific manner (FDR = 0.0003, LDA score = 4.34). N = Stomach: 11 CST I, 15 CST IV; Jejunum: 5 CST I, 13 CST IV; Ileum: 6 CST I, 14 CST IV; Colon: 10 CST I, 13 CST IV samples that passed quality filtering. Data represented as median  $\pm$  IQR with individual data points overlaid.

## Supplementary Figure 4

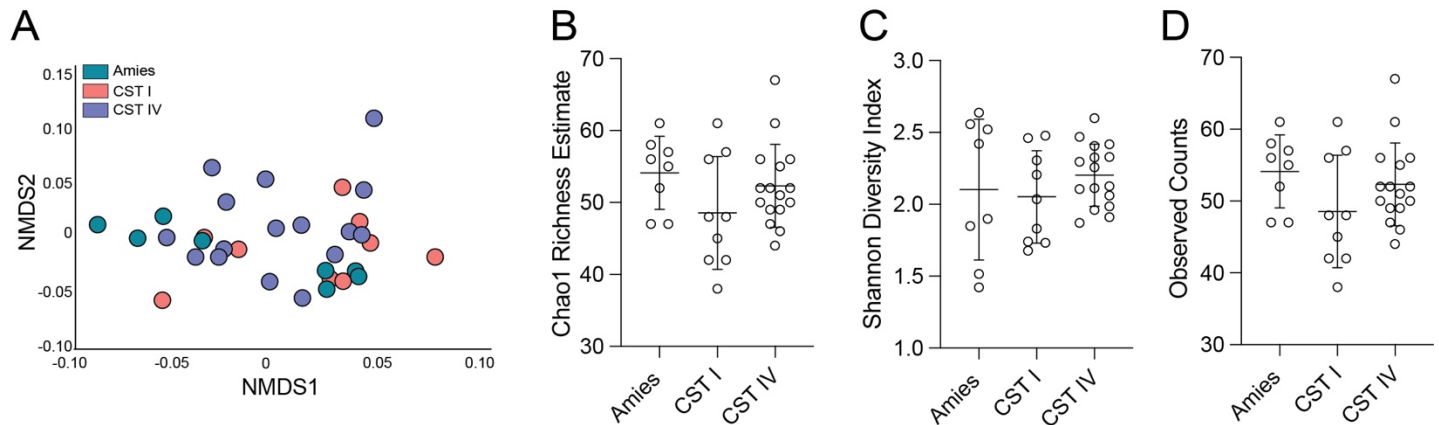

### Supplementary Figure 4. Fecal microbiota composition in adulthood is similar between Amies, CST I and CST IV inoculated adult males.

(A) NMDS analysis showing similarity in community structure in Amies, CST I and CST IV inoculates males in adulthood (PERMANOVA, F-value = 1.7458,  $R^2=0.1043$ ,  $p = 0.134$ ). N = 8 Amies males, 9 CST I males, 16 CST IV males.

(B) Barplot demonstrating similarities in the alpha diversity measure Chao1 Richness Estimate between Amies, CST I, and CST IV C-section adult males (One-way ANOVA, F-value = 1.82,  $p = 0.17$ ). N = 8 Amies males, 9 CST I males, 16 CST IV males. Data represented as mean  $\pm$  SD with individual data points overlaid.

(C) Barplot demonstrating similarities in the alpha diversity measure Shannon Diversity Index between Amies, CST I, and CST IV C-section adult males (One-way ANOVA, F-value = 0.66,  $p = 0.52$ ). N = 8 Amies males, 9 CST I males, 16 CST IV males. Data represented as mean  $\pm$  SD with individual data points overlaid.

(D) Barplot demonstrating similarities in the alpha diversity measure Observed Counts between Amies, CST I, and CST IV C-section adult males (One-way ANOVA, F-value = 1.82,  $p = 0.18$ ). N = 8 Amies males, 9 CST I males, 16 CST IV males. Data represented as mean  $\pm$  SD with individual data points overlaid.

# Supplementary Figure 5

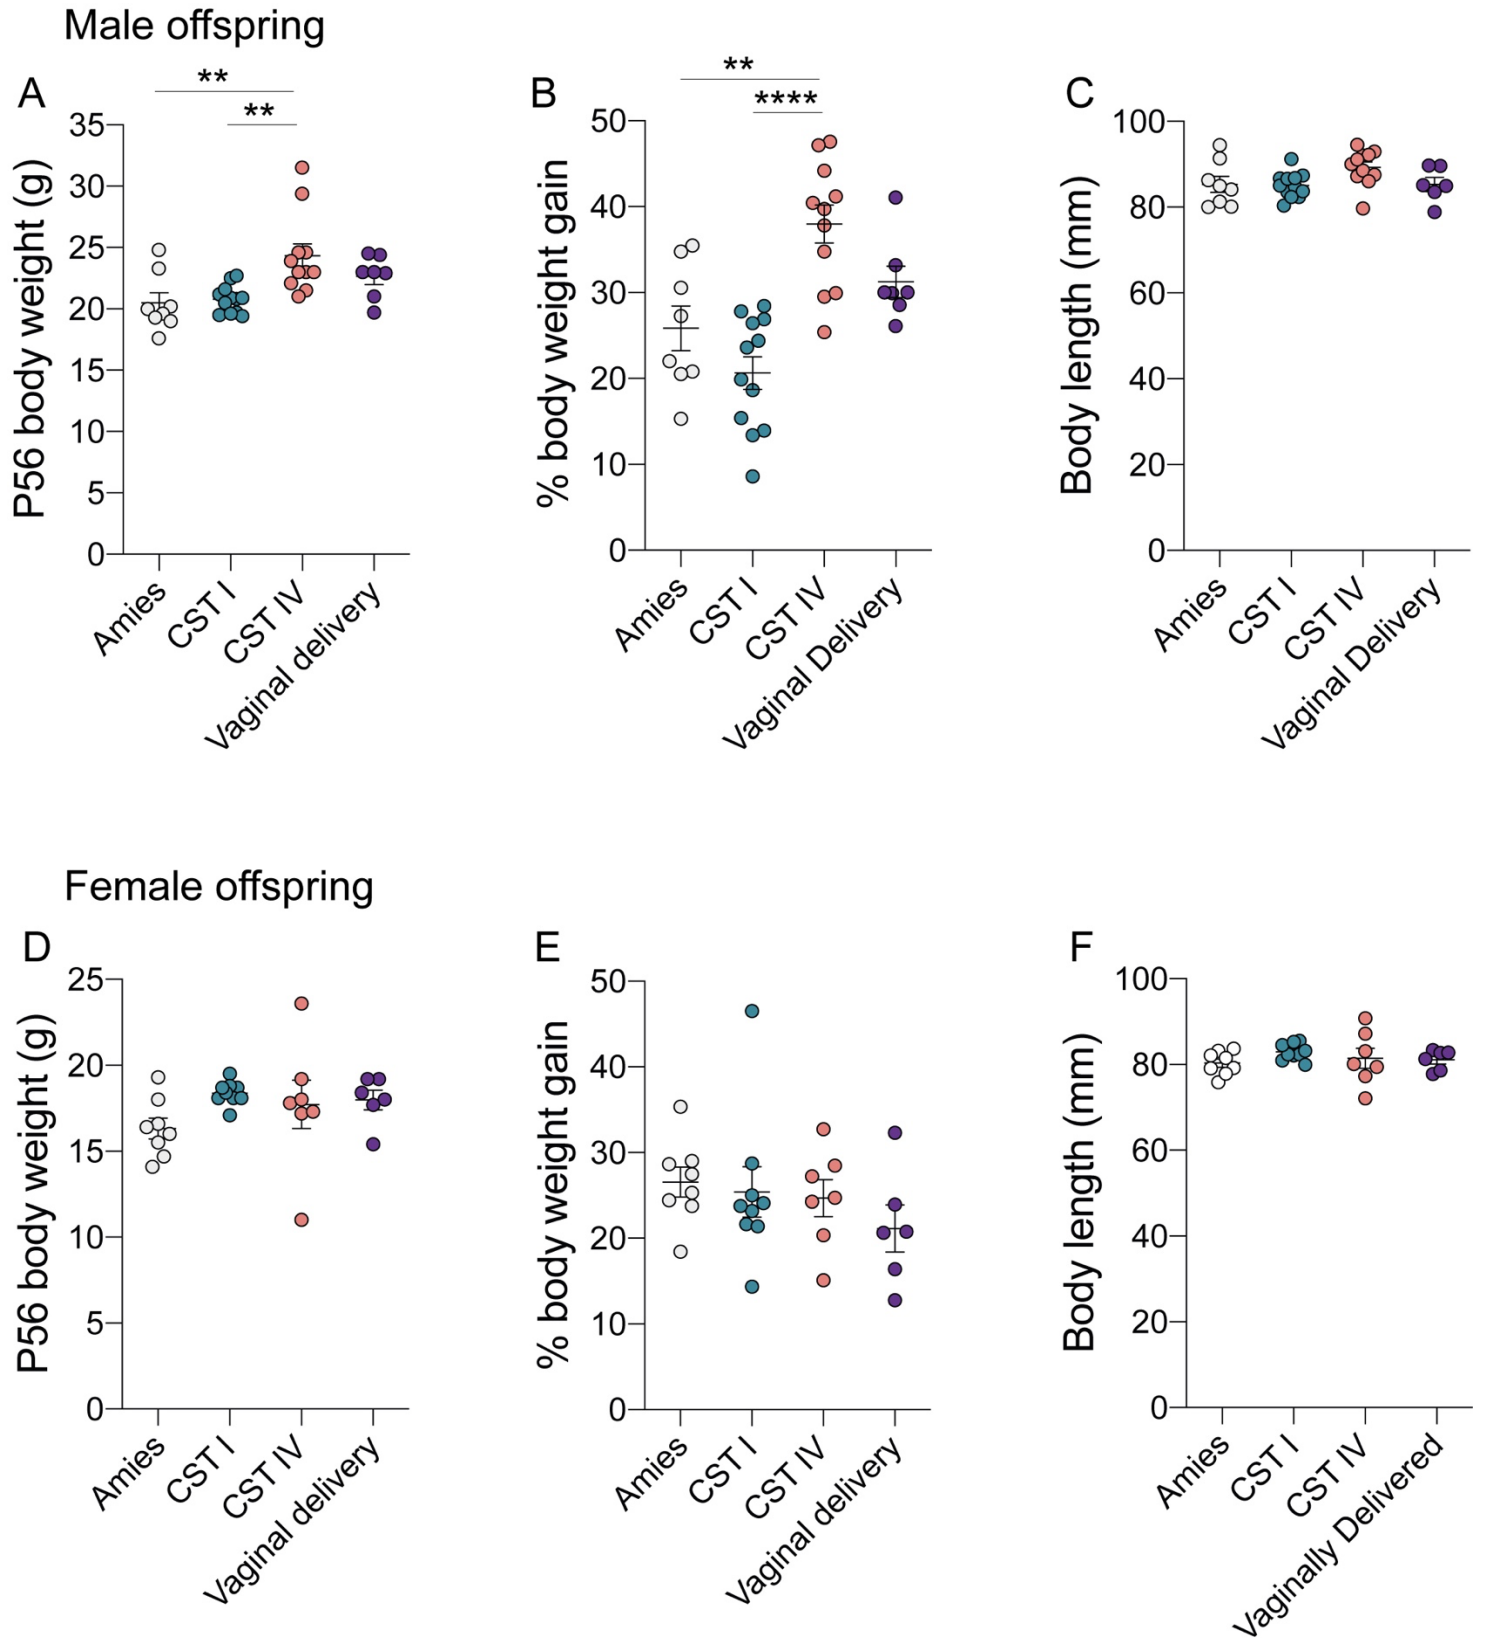

**Supplementary Figure 5. Exposure to human vaginal microbiota associates with body weight measurements in a sex-specific manner.**

**(A)** CST IV males weighed more than CST I and Amies males (one-way ANOVA, main effect of treatment,  $F_{3,34} = 6.280$ ,  $P = 0.0017$ ); Tukey's post-hoc, CST I vs. CST IV,  $P = 0.0039$ ; Amies vs. CST IV,  $P = 0.0050$ ).  $N = 7$  Amies, 12 CST I, 11 CST IV, 7 vaginally delivered males. Data represented as mean  $\pm$  SEM with individual data points overlaid. \*\*  $P < 0.01$ .

**(B)** CST IV males showed increased percent body weight gain from P28 to P56 compared with CST I and Amies males  $F_{3,34} = 13.58$ ,  $P < 0.0001$ ; Tukey's post-hoc, CST I vs. CST IV,  $P < 0.0001$ ; Amies vs. CST IV,  $P = 0.0024$ ).  $N = 7$  Amies, 12 CST I, 11 CST IV, 7 vaginally delivered males. Data represented as mean  $\pm$  SEM with individual data points overlaid. \*\*  $P < 0.01$ , \*\*\*\*  $P < 0.0001$ .

**(C)** Body weight differences were not due to differences in body length between Amies, CST I, CST IV, and vaginally delivered males at P56.  $N = 7$  Amies, 12 CST I, 11 CST IV, 7 vaginally delivered males. Data represented as mean  $\pm$  SEM with individual data points overlaid.

**(D to F)** No differences in P56 body weight, percent body weight gain, or body length were observed between Amies, CST I, CST IV, and vaginally delivered female offspring.  $N = 8$  Amies, 9 CST I, 7 CST IV, 6 vaginally delivered females. Data represented as mean  $\pm$  SEM with individual data points overlaid.

Supplementary Figure 6.

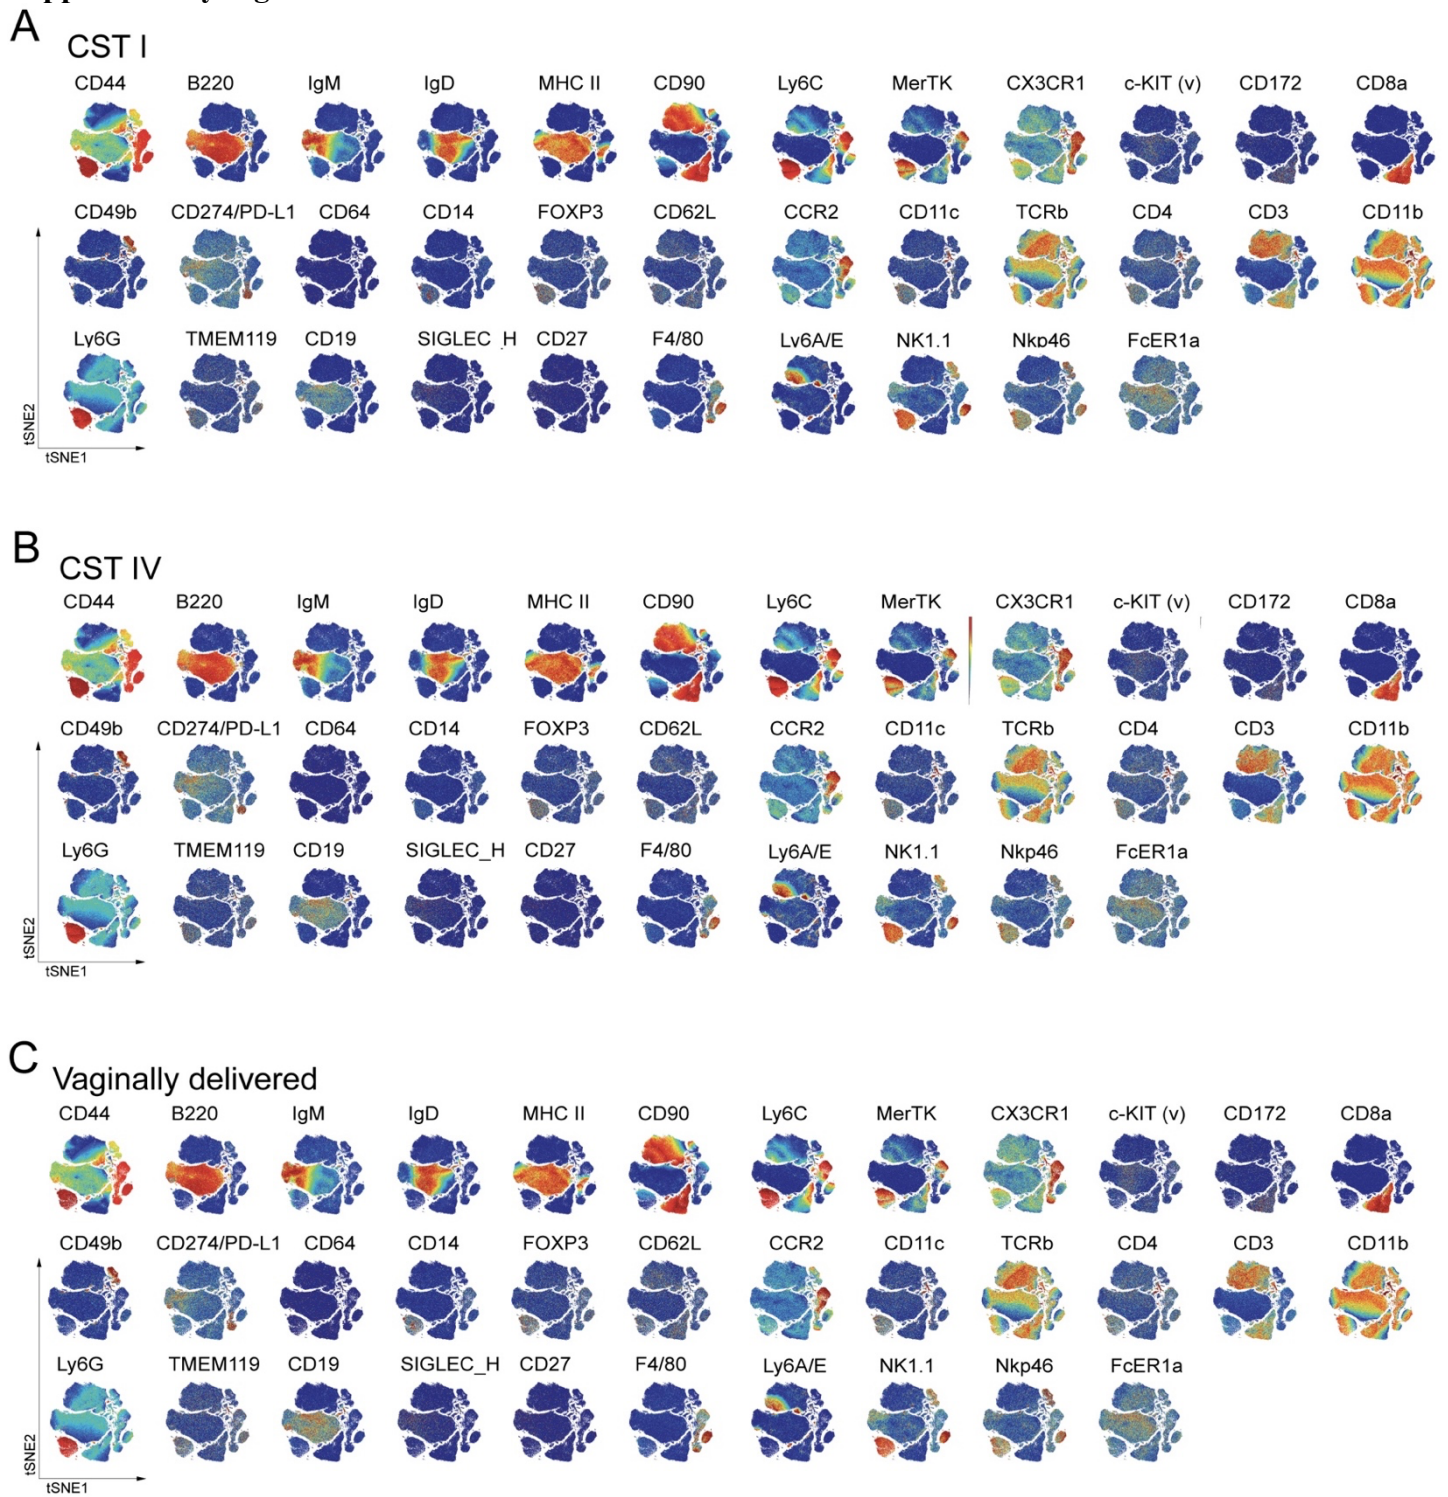

**Supplementary Figure 6. High-dimensional analysis of mass cytometry data using viSNE comparing the lasting effects of mode of delivery and birth-associated exposure to human vaginal microbiota on the circulating immune compartment.**

(A to C) High-dimensional analysis of mass cytometry data using viSNE comparing the lasting effects of mode of delivery and colonization by human vaginal microbiota on the circulating immune compartment of cesarean delivered males inoculated with (a) CST I or (b) CST IV and (c) vaginally delivered males at postnatal day 56. viSNE maps were generated using equal sampling across treatment groups and the markers shown were used to generate the maps (n= 390,000 total events sampled, representative average from N = 3 -7 males per treatment).

Supplementary Figure 7

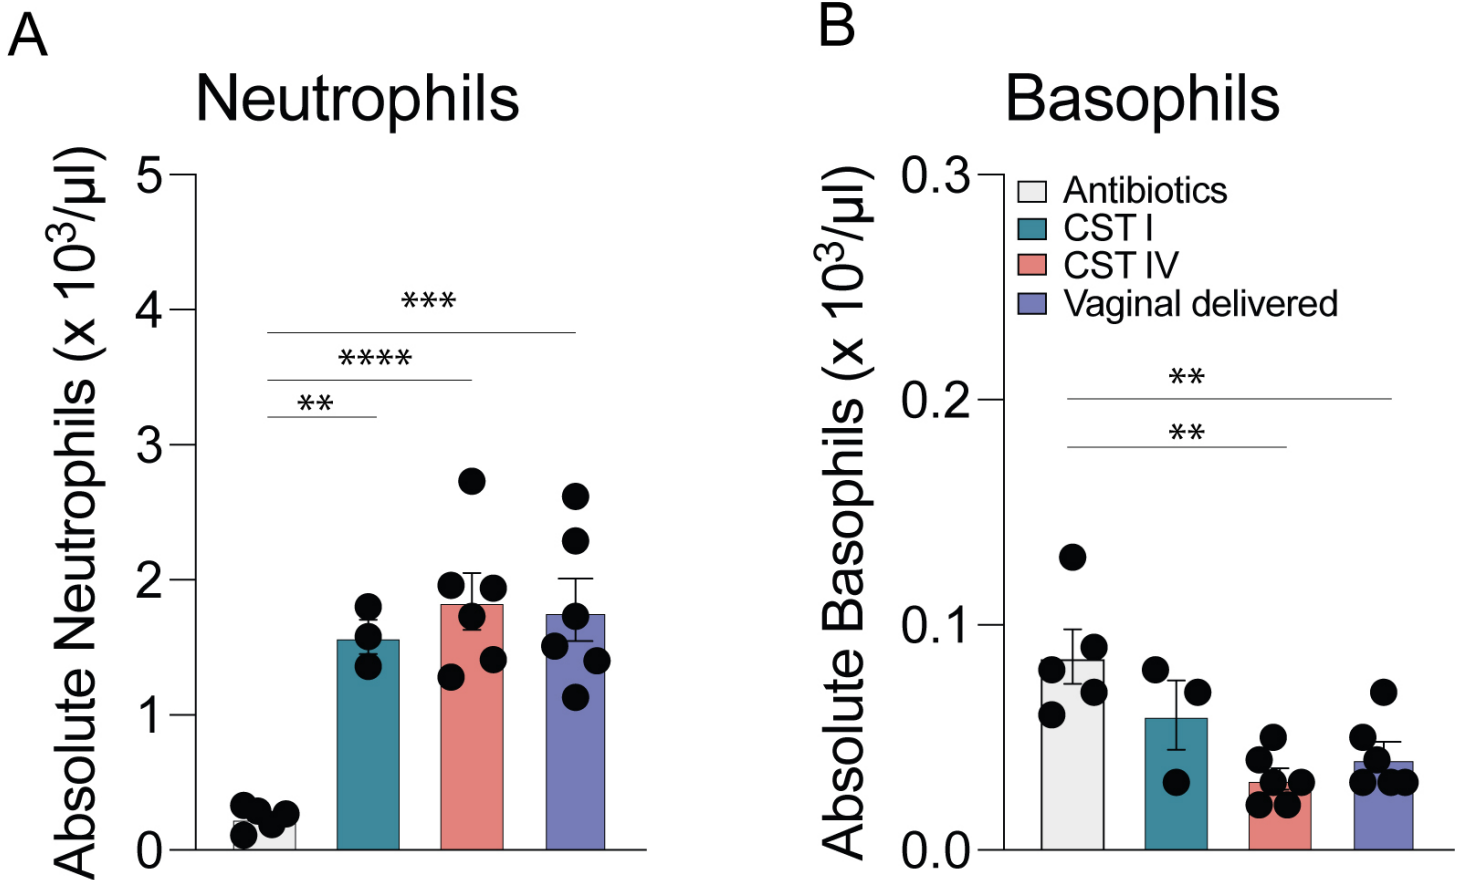

**Supplementary Figure 7. Birth-associated exposure to microbiota influences number of circulating neutrophils and basophils in 24-hour old males.**

(A) To determine whether early life colonization is necessary for expansion of neutrophil counts in circulation, we exposed pregnant dams to a clinically relevant combination of ampicillin, gentamicin and vancomycin (all 1 mg ml<sup>-1</sup>) starting at gestational day 15 to postnatal day 1. On postnatal day (P) 1, corresponding to 24 hr post-inoculation, absolute white blood cell counts were quantified on an Element HT5 veterinary hematology analyzer. Neutrophil count is significantly decreased in P1 antibiotic-exposed males compared with CST I, CST IV and vaginally delivered males (one-way ANOVA, main effect of treatment,  $F_{3,16} = 15.46$ ,  $P < 0.0001$ ; Tukey's post-hoc, Antibiotics vs. CST I,  $P = 0.0034$ ; Antibiotics vs. CST IV  $P < 0.0001$ ; P2 Antibiotics vs. VD  $P = 0.0001$ ).  $N = 5$  Antibiotics males, 3 CST I males, 6 CST IV males, 6 vaginally delivered males. Data are represented as mean  $\pm$  SEM. \*\*  $P < 0.01$ , \*\*\*  $P < 0.001$ , \*\*\*\*  $P < 0.0001$ .

(B) Basophil count is significantly increased in P1 antibiotic-exposed males compared with CST IV and vaginally delivered males (one-way ANOVA, main effect of treatment,  $F(3, 16) = 7.710$ ,  $P = 0.002$ ; Tukey's post-hoc, Antibiotics vs. CST IV  $P = 0.0018$ ; P2 Antibiotics vs. VD  $P = 0.0096$ ).  $N = 5$  Antibiotics males, 3 CST I males, 6 CST IV males, 6 vaginally delivered males. Data are represented as mean  $\pm$  SEM. \*\*  $P < 0.01$ .

## Supplementary Figure 8

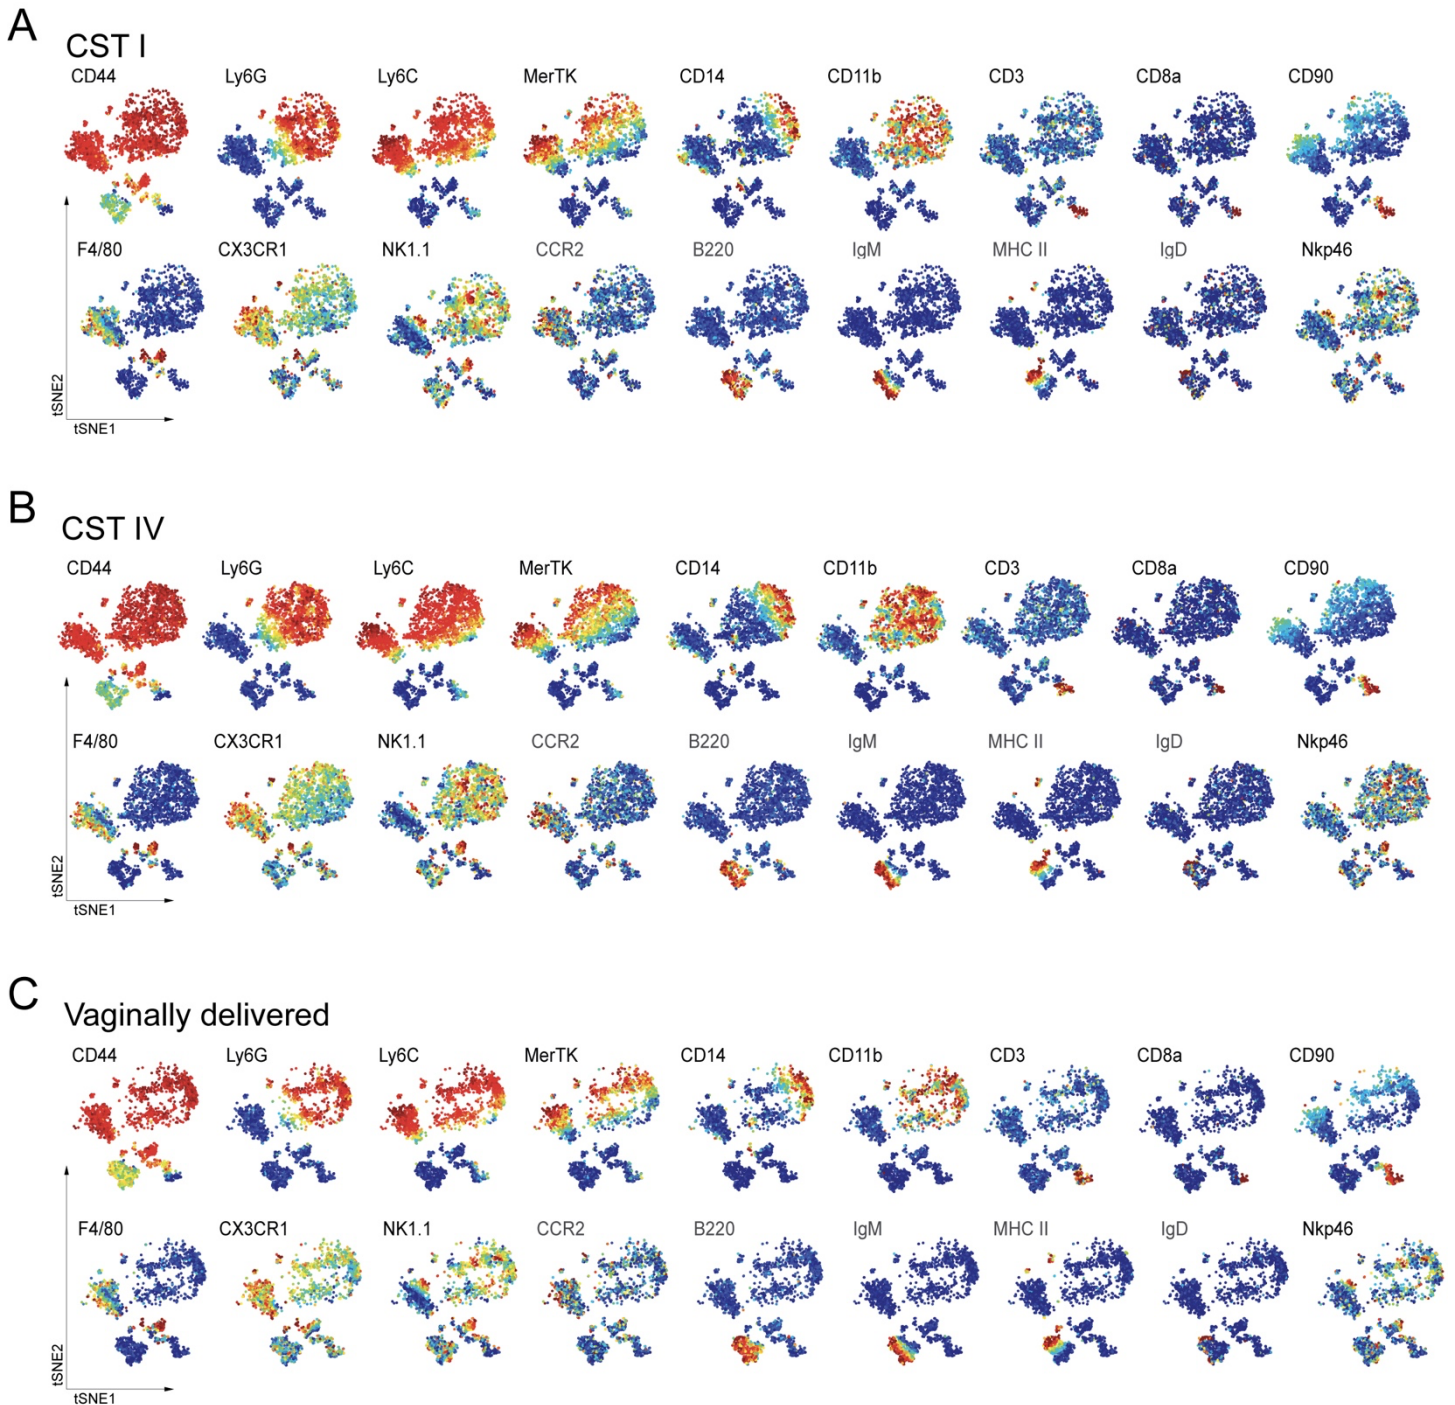

**Supplementary Figure 8. High-dimensional analysis of circulating immune compartment following birth-associated exposure to microbiota.**

(A to C) High-dimensional analysis of mass cytometry data using viSNE comparing the circulating immune compartment of cesarean delivered males inoculated with human vaginal (a) CST I or (b) CST IV and (c) vaginally delivered males at postnatal day 1, corresponding to 24 hrs post-inoculation. viSNE maps were generated using equal sampling and the markers shown were used to generate the maps (n = 10,000 total events sampled, representative average from N = 3 males per treatment).

## Supplementary Figure 9

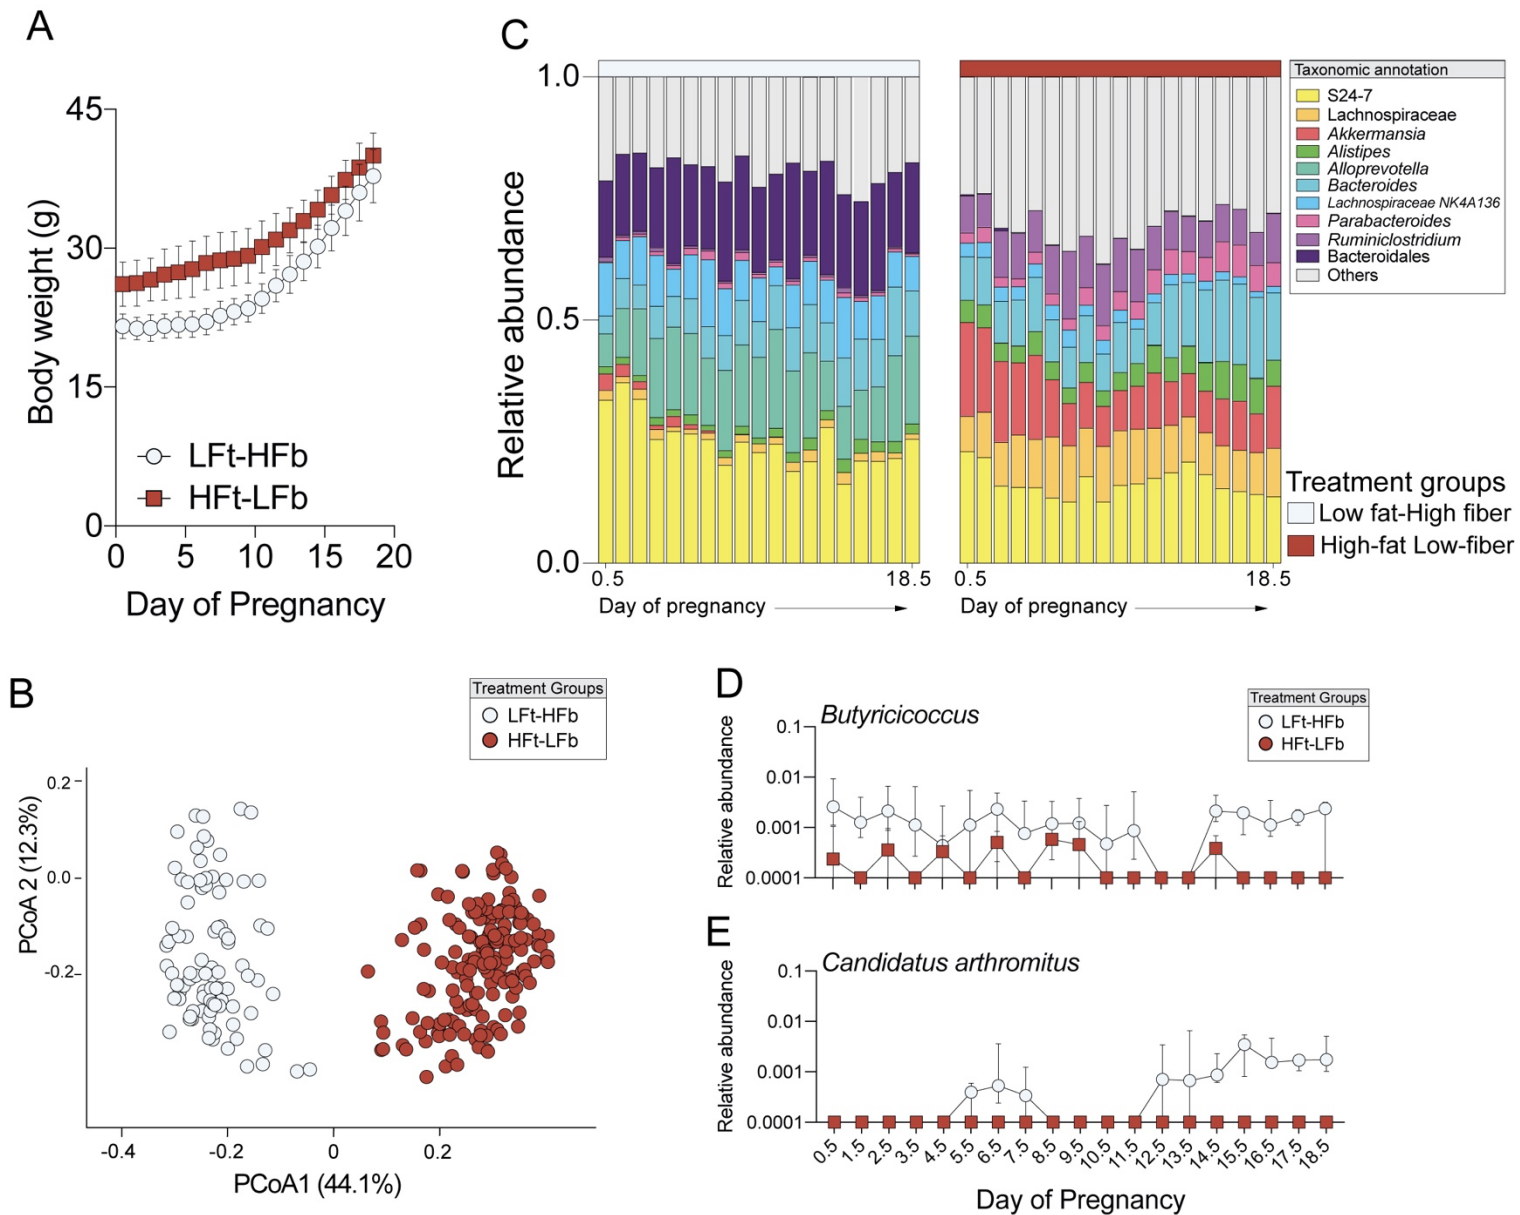

### Supplementary Figure 9. Maternal consumption of a high fat-low fiber diet results in persistent disruption to body weight and gut microbiota during pregnancy.

(A) Excessive maternal weight gain during pregnancy in dams consuming a high-fat low-fiber diet (two-way ANOVA, main effect of time,  $F_{18,324} = 474.24$ ,  $P < 0.0001$ ; main effect of diet,  $F_{1,18} = 23.51$ ,  $P < 0.0001$ ; time\*diet interaction,  $F_{18,324} = 6.73$ ,  $P < 0.0001$ ). No effect of *G. vaginalis* 11E4 on body weight was observed, thus samples are shown collapsed by diet. N = 8 LFT-HFb dams, 12 HFT-LFb dams per timepoint. Data represented as mean  $\pm$  SEM with individual datapoints overlaid. Data is representative of two independent experiments

(B) Principal coordinates analysis demonstrating distinct clustering between dams consuming a high-fat low fiber and low-fat high-fiber diet across pregnancy. No effect of *G. vaginalis* 11E4 on gut microbiota structure was observed, thus samples are shown collapsed by diet. N = 12 – 20 females per treatment and timepoint, total of 259 samples.



(c) Mean relative abundance of top ten lasting disruption to the fecal microbiota during pregnancy in females consuming a high-fat low-fat diet. No effect of *G. vaginalis* 11E4 on gut microbiota composition was observed, thus samples are shown collapsed by diet. N = 12 – 20 females per treatment and timepoint, total of 259 samples.

(D) LEfSe analysis demonstrating decreased relative abundance of the butyrate-producing taxa *Butyricoccus* in females consuming a high-fat low-fat diet (FDR = , LDA score =). No effect of *G. vaginalis* 11E4 on *Butyricoccus* relative abundance was observed, thus samples are shown collapsed by diet. N = 8 Lf-HFb dams, 12 HF-LFb dams per timepoint., total of 259 samples that passed quality filtering. Data represented as median ± IQR with individual data points overlaid.

(E) LEfSe analysis demonstrating decreased abundance of the immunomodulatory *Candidatus Arthromitus* in females consuming a high-fat low-fat diet during late pregnancy (FDR = , LDA score =). No effect of *G. vaginalis* 11E4 on *Candidatus Arthromitus* relative abundance was observed, thus samples are shown collapsed by diet. N = 8 Lf-HFb dams, 12 HF-LFb dams per timepoint., total of 259 samples that passed quality filtering. Data represented as median ± IQR with individual data points overlaid.

## Supplementary Figure 10

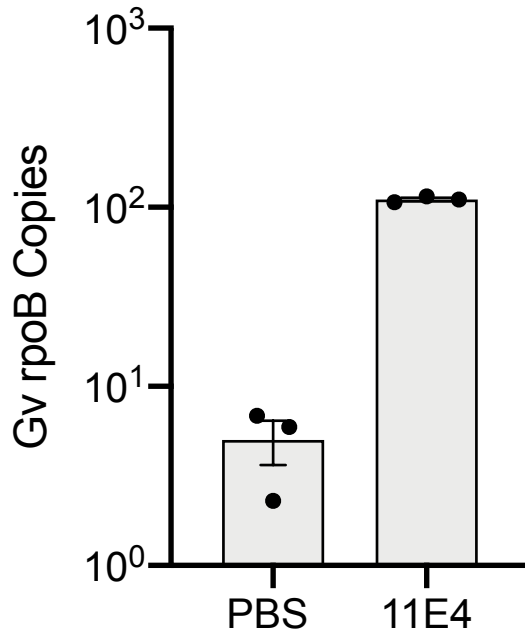

**Supplementary Figure 10. Confirmation of *G. vaginalis* isolate 11E4 in vaginal fluid 48hrs post-colonization.**

Presence of Gv was significantly increased in the vaginal fluid from Gv inoculated dams relative to PBS inoculated dams (Unpaired two-sided t-Test,  $t_4 = 36.45$ ,  $P < 0.0001$ ). N = 3 PBS inoculated dams, 3 Gv 11E4 inoculated dams. Data represented as mean  $\pm$  SEM with individual data points overlaid.

## Supplementary Figure 11

**A**

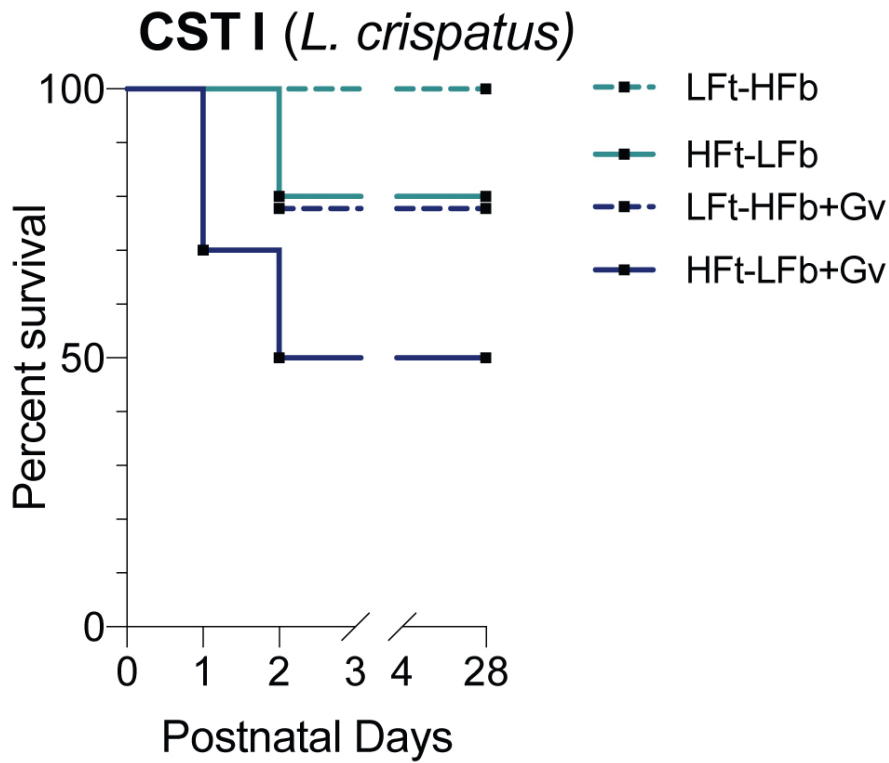

**Supplementary Figure 11. Combined effects of exposure to compounding maternal insults and colonization by human vaginal CST I on offspring survival.**

(A) Survival of offspring from dams that experience a single or multiple compounding adversities. All pups were C-section delivered and gavaged with human CST I inoculant. LFt-HFb = low-fat high-fiber; HFt-LFb = high-fat low-fiber; Gv = *G. vaginalis* 11E4. Kaplan-Meier survival analysis. N=15 offspring per treatment condition.

## Supplementary Figure 12

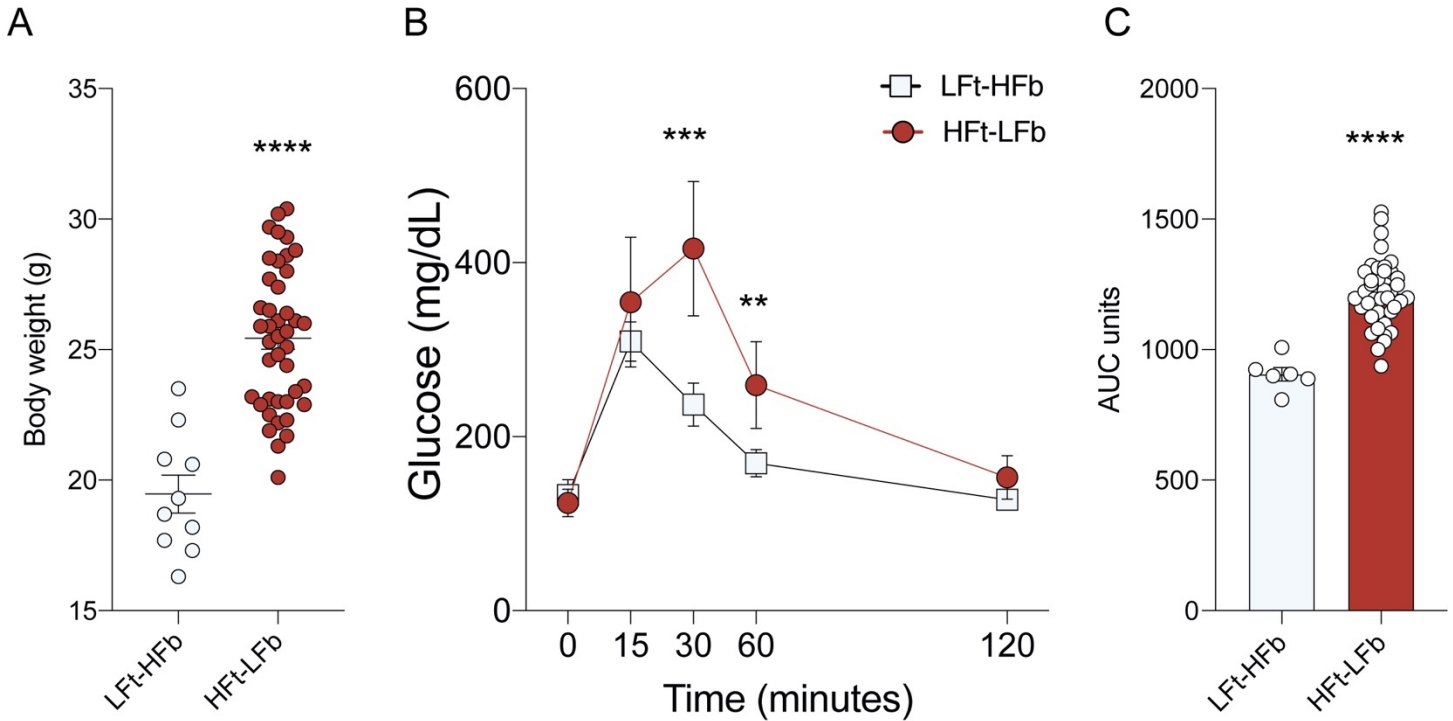

### Supplementary Figure 12. Replication cohort confirms excessive maternal weight gain and glucose intolerance in females consuming a high fat-low fiber diet for six weeks.

(A) Consumption of a high-fat low-fiber diet for six weeks increases body weight in females consuming a high-fat low-fiber diet compared with females consuming a low-fat high-fiber diet (two-tailed t-Test,  $t_{50} = 6.408$ ,  $P < 0.0001$ ).  $N = 10$  LfHf females, 42 HfLf females. Data represented as mean  $\pm$  SD. \*\*\*\*  $P < 0.0001$ .

(B) Plasma levels of glucose levels during a glucose tolerance test in females consuming either a high-fat low-fiber or low-fat high-fiber diet. Females consuming a high-fat low-fiber diet showed significant delay in glucose clearance (two-way ANOVA, main effect of time,  $F_{4, 180} = 84.09$ ,  $P < 0.0001$ ; main effect of diet,  $F_{1, 45} = 29.65$ ,  $P < 0.0001$ ; time\*diet interaction,  $F_{4, 180} = 11.56$ ,  $P < 0.0001$ ).  $N = 6$  LfHf females, 36 HfLf females. Data represented as mean  $\pm$  SD. \*\*  $P < 0.01$ ; \*\*\*  $P < 0.001$ .

(C) AUC of total plasma glucose levels showing increase glucose levels in females consuming a high-fat low-fiber diet (two-tailed T test,  $t_{44} = 5.821$ ,  $P < 0.0001$ ).  $N = 6$  LfHf females, 36 HfLf females. Data represented as mean  $\pm$  SD with individual datapoints overlaid. \*\*\*\*  $P < 0.0001$ .

## Supplementary Figure 13

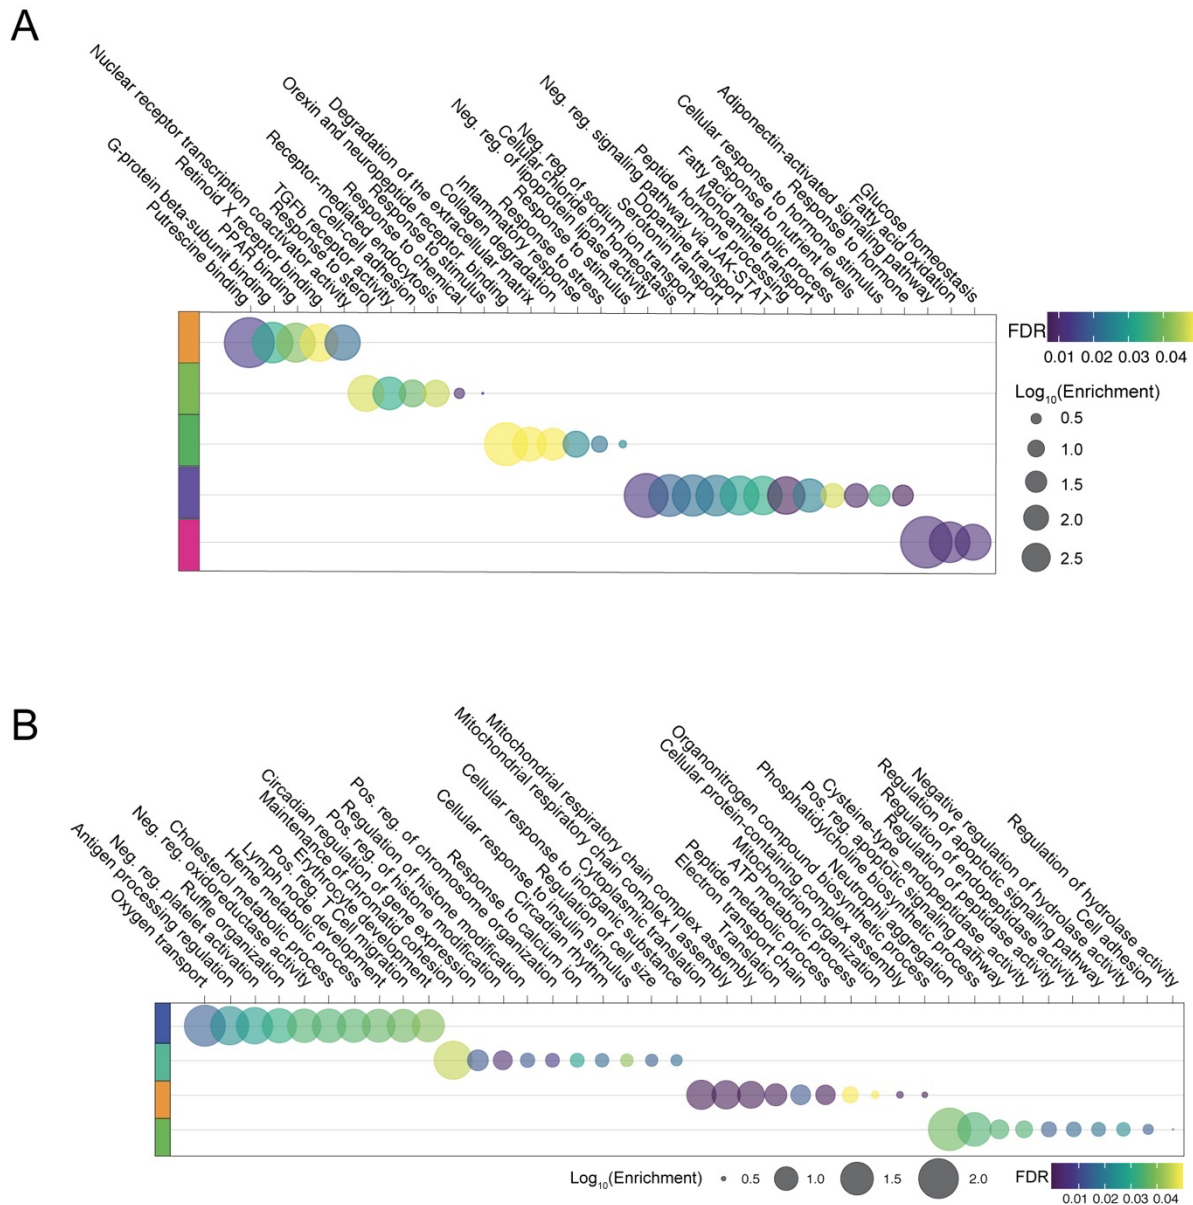

**Supplementary Figure 13. Cluster-based functional enrichment analysis showing significant effect of HFt-LFb and *G. vaginalis* and their combination on metabolic and immune pathways in the E18.5 placenta.**

**(A)** Cluster-based functional enrichment analysis of differentially expressed genes in the placenta of embryonic day 18.5 males, showing significant disruption in pathways involved in nutrient transport and fatty acid metabolism in the placenta of males exposed to a maternal high-fat low fiber diet and *G. vaginalis* vaginal colonization (FDR < 0.05). Bubble plot size denotes enrichment. Clusters identified in differential gene expression analysis were used for this pathway enrichment. N = 3 males per treatment.

**(B)** Cluster-based functional enrichment analysis of differentially expressed genes in the ileum of embryonic day 18.5 males, showing significant disruption in pathways involved in tissue development, chromatin modification, immunity, and mitochondrial function in the ileum of males exposed to a maternal high-fat low fiber diet and *G. vaginalis* vaginal colonization (FDR < 0.05). Bubble plot size denotes enrichment. Clusters identified in differential gene expression analysis were used for this pathway enrichment. N = 3 males per treatment.

## Supplementary Figure 14

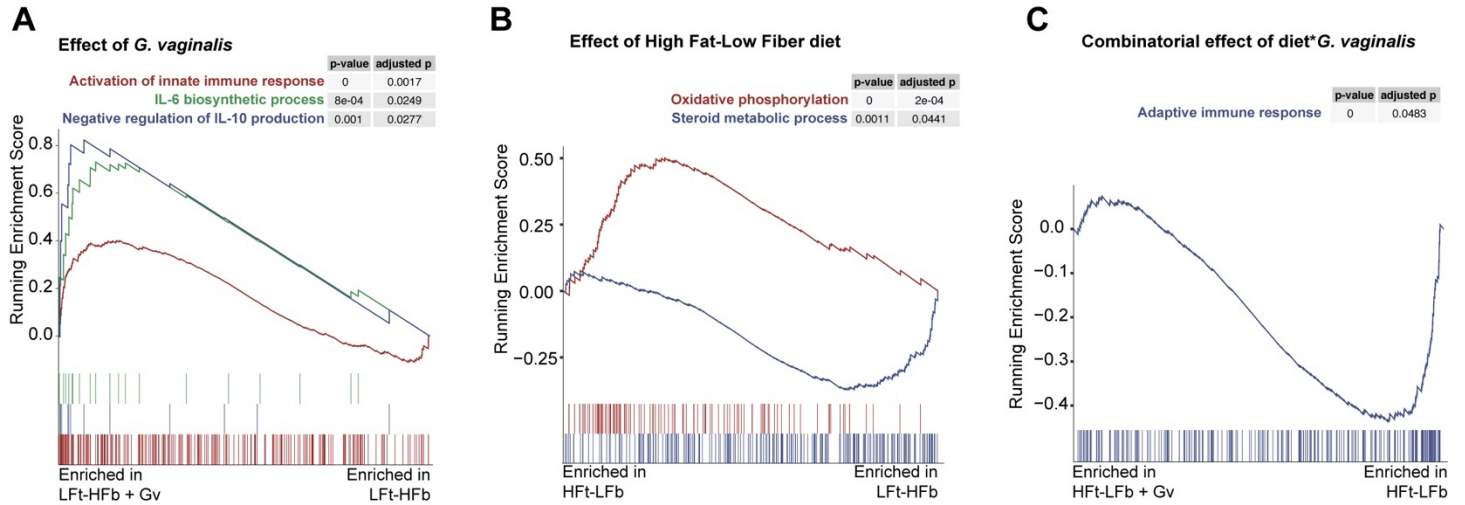

### Supplementary Figure 14. Gene set enrichment analysis (GSEA) showing significant effect of HFt-LFb and *G. vaginalis* and their combination on metabolic and immune pathways in the E18.5 placenta.

(A) Analysis comparing the effects of *G. vaginalis* in LFt-HFb placentas shows significant enrichment of gene sets involved in activation of innate immune response, IL-6 biosynthesis, and negative regulation of IL-10 production relative to LFt-HFb placentas (N = 3 males per group, GSEA cut off  $FDR \leq 0.05$ ,  $NES > |1.5|$ ).

(B) Analysis comparing the effects of diet shows significant dysregulation of gene sets involved in oxidative phosphorylation and steroid metabolic processes in HFt-LFb male placentas relative to LFt-HFb male placentas (N = 3 males per group, GSEA cut off  $FDR \leq 0.05$ ,  $NES > |1.5|$ ).

(C) Analysis comparing the interaction between diet and *G. vaginalis* shows significant dysregulation of gene sets involved in the adaptive immune response in HFt-LFb + Gv male placentas relative to LFt-HFb male placentas (N = 3 males per group, GSEA cut off  $FDR \leq 0.05$ ,  $NES > |1.5|$ ).

## Supplementary Figure 15

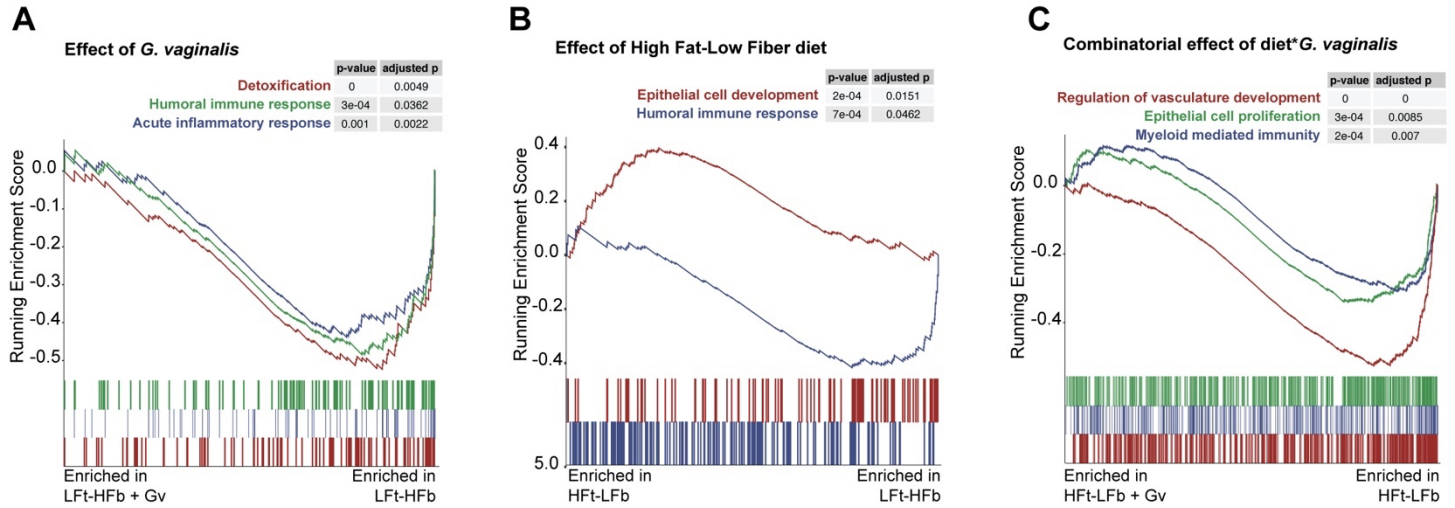

**Supplementary Figure 15. Gene set enrichment analysis (GSEA) showing significant effect of HFt-LFb and *G. vaginalis* and their combination on pathways involved in immune, epithelial and vasculature maturation of the E18.5 ileum.**

(A) Analysis comparing the effects of *G. vaginalis* in LFt-HFb ileum shows disruption in the gene sets involved in metabolic detoxification, the humoral immune response and the acute inflammatory response relative to the ileum of LFt-HFb pups (N = 3 males per group, GSEA cut off FDR  $\leq 0.05$ , NES  $> |1.5|$ ).

(B) Analysis comparing the effects of diet shows significant dysregulation of gene sets involved in humoral immune response and epithelial cell development in HFt-LFb male ileum samples relative to LFt-HFb male ileum samples (N = 3 males per group, GSEA cut off FDR  $\leq 0.05$ , NES  $> |1.5|$ ).

(C) Analysis comparing the interaction between diet and *G. vaginalis* shows significant dysregulation of gene sets involved in the regulation of vasculature development, epithelial cell proliferation and myeloid mediated immunity in HFt-LFb + Gv male ileum samples relative to LFt-HFb male ileum samples (N = 3 males per group, GSEA cut off FDR  $\leq 0.05$ , NES  $> |1.5|$ ).
